# Supplementary material
Source: PubMed Central journal article supplement (PMC3163124)
Supplement: NIHMS309867-supplement-01.pdf [file NIHMS309867-supplement-01.pdf]

## Supplementary Figures

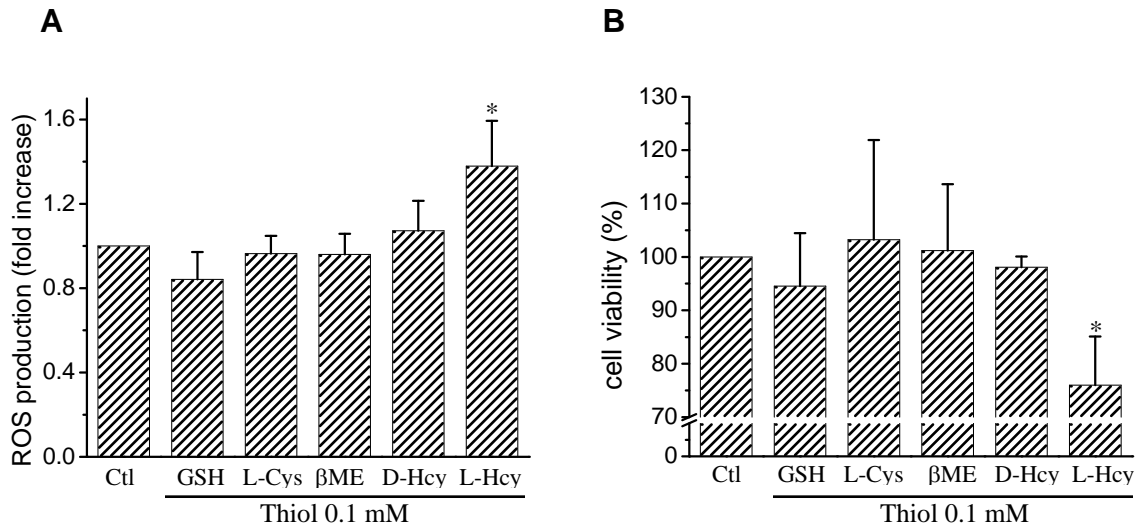

**Figure S1. Thiol specificity for eliciting ROS.** Pre-confluent HAEC were incubated with varying thiols (0.1 mmol/L) for 48 h. **A.** ROS production 48 h post treatment. **B.** Cell viability after 48 h. \* $p < 0.05$  compared to control untreated cells. Data are expressed as mean  $\pm$  SEM,  $N = 3$ .

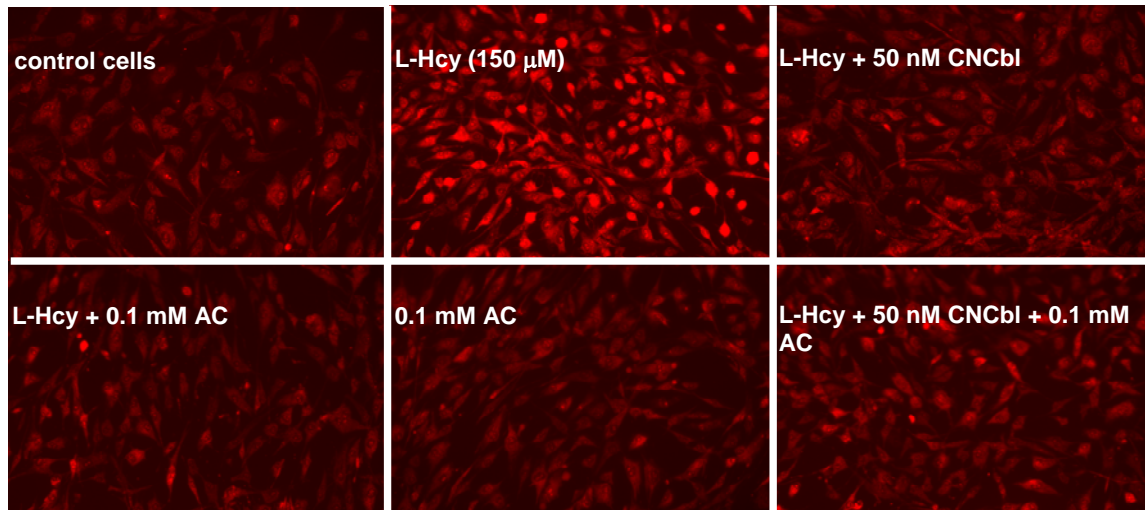

**Figure S2. Cbl protection against L-Hcy induced superoxide production.** Pre-confluent HAEC were incubated in the absence or in the presence of 50 nmol/L CNCbl for 24 h. Cells were washed with PBS, prior to incubation with 150  $\mu\text{mol/L}$  L-Hcy with or without 0.1 mmol/L apocynin. After 24 h, cells were incubated with 5  $\mu\text{mol/L}$  DHE for 1 h. After quantifying fluorescence in a microplate reader, cells were imaged with an Olympus IX-71 inverted epifluorescence microscope.

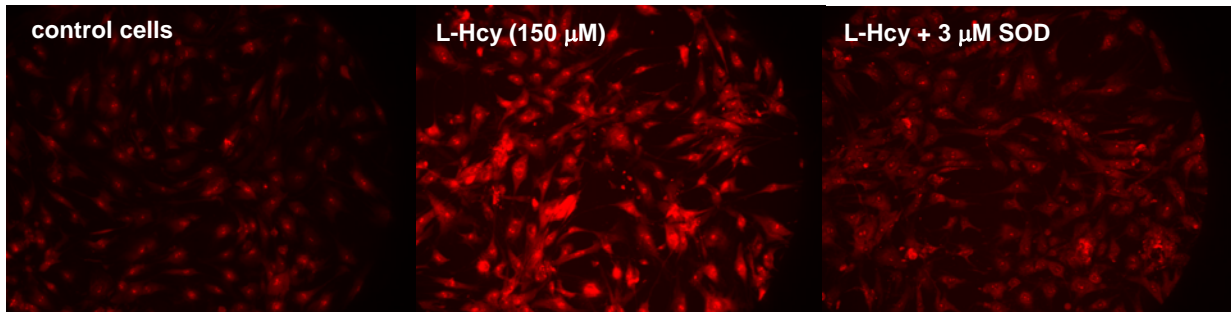

**Figure S3. SOD protection against L-Hcy induced superoxide production.** HAEC were incubated with 150  $\mu\text{M}$  L-Hcy with or without 3  $\mu\text{M}$  SOD. After 24 h, cells were incubated with 5  $\mu\text{M}$  DHE for 1 h. After quantifying fluorescence in a microplate reader, cells were imaged with an Olympus IX-71 inverted epifluorescence microscope.

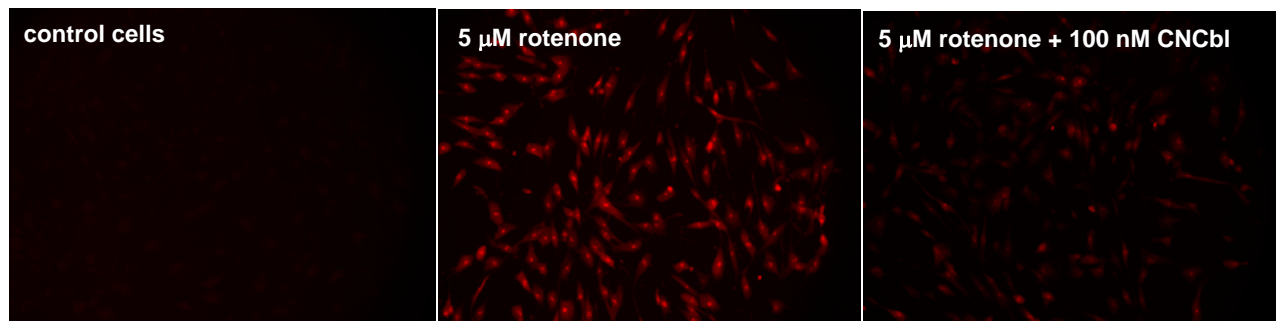

**Figure S4. Cbl protection against rotenone-induced mitochondrial superoxide production.** Pre-confluent HAEC were incubated in the absence or in the presence of 100 nmol/L CNCbl for 24 h. HAEC were washed and incubated with rotenone (5  $\mu\text{mol/L}$ ; 1 h). After quantifying fluorescence in a microplate reader, cells were imaged with an Olympus IX-71 inverted epifluorescence microscope.
